# Supplementary material for: Associations of 24-Hour Movement Behavior with Depressive Symptoms and Anxiety in Children: Cross-Sectional Findings from a Chinese Sample
Source: MDPI journal article supplement (doi:10.3390/healthcare9111532), 2021-11-10
Supplement: s1 [file s1]

**Table S1.** The association between number of recommendations meet and depressive symptoms (higher severity).

| Depressive Symptoms            |  |      |        |      |
|--------------------------------|--|------|--------|------|
| Number Met the Recommendations |  | OR   | 95% CI |      |
| 3                              |  | 0.32 | 0.23   | 0.46 |
| 2                              |  | 0.48 | 0.41   | 0.55 |
| 1                              |  | 0.74 | 0.65   | 0.83 |
| 0                              |  |      | Ref    |      |
| Random Effects                 |  |      |        |      |
| District                       |  | 0.01 | 0.00   | 0.25 |
| School                         |  | 0.06 | 0.03   | 0.14 |

OR: odd ratio; CI: confidence interval.; Ref: reference group.

**Table S2.** The association between specific combinations of recommendations meet and depressive symptoms (higher severity).

| Depressive Symptoms |                                   |      |        |      |
|---------------------|-----------------------------------|------|--------|------|
|                     | Number Met the<br>Recommendations | OR   | 95% CI |      |
|                     | All                               | 0.31 | 0.21   | 0.44 |
|                     | Screen time + MVPA                | 0.65 | 0.51   | 0.82 |
|                     | Sleep + MVPA                      | 0.72 | 0.48   | 1.08 |
|                     | Sleep + screen time               | 0.40 | 0.34   | 0.47 |
|                     | MVPA only                         | 1.10 | 0.83   | 1.47 |
|                     | Screen time only                  | 0.73 | 0.64   | 0.82 |
|                     | Sleep only                        | 0.68 | 0.56   | 0.83 |
|                     | None                              |      | Ref    |      |
| Random Effects      |                                   |      |        |      |
|                     | District                          | 0.01 | 0.00   | 0.68 |
|                     | School                            | 0.06 | 0.02   | 0.15 |

OR: odd ratio; CI: confidence interval, Ref: reference group.

**Table S3.** The association between number of recommendations meet and symptoms of anxiety (higher severity).

| Anxiety Symptoms |                                   |      |        |      |
|------------------|-----------------------------------|------|--------|------|
|                  | Number Met the<br>Recommendations | OR   | 95% CI |      |
|                  | 3                                 | 0.31 | 0.20   | 0.48 |
|                  | 2                                 | 0.46 | 0.39   | 0.55 |
|                  | 1                                 | 0.67 | 0.59   | 0.76 |
|                  | 0                                 |      | Ref    |      |
| Random Effects   |                                   |      |        |      |
|                  | District                          | 0.02 | 0.00   | 0.24 |
|                  | School                            | 0.03 | 0.02   | 0.16 |

OR: odd ratio; CI: confidence interval. Ref: reference group.

**Table S4.** The association between specific combinations of recommendations met and symptoms of anxiety (higher severity).

| Anxiety Symptoms |                                   |      |        |      |
|------------------|-----------------------------------|------|--------|------|
|                  | Number Met the<br>Recommendations | OR   | 95% CI |      |
|                  | All                               | 0.31 | 0.20   | 0.48 |
|                  | Screen time + MVPA                | 0.78 | 0.60   | 1.01 |
|                  | Sleep + MVPA                      | 0.72 | 0.45   | 1.14 |
|                  | Sleep + screen time               | 0.35 | 0.29   | 0.43 |
|                  | MVPA only                         | 1.03 | 0.75   | 1.41 |
|                  | Screen time only                  | 0.65 | 0.57   | 0.75 |
|                  | Sleep only                        | 0.65 | 0.53   | 0.81 |
|                  | None                              |      | Ref    |      |
| Random Effects   |                                   |      |        |      |
|                  | District                          | 0.02 | 0.00   | 0.25 |
|                  | School                            | 0.06 | 0.02   | 0.17 |

OR: odd ratio; CI: confidence interval; Ref: reference group.
